# Supplementary material
Source: PubMed Central journal article supplement (PMC7011861)
Supplement: NIHMS1027417-supplement-1.pdf [file NIHMS1027417-supplement-1.pdf]

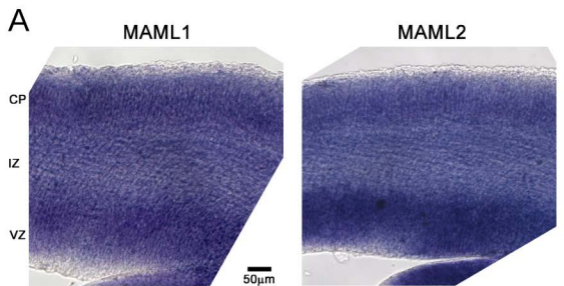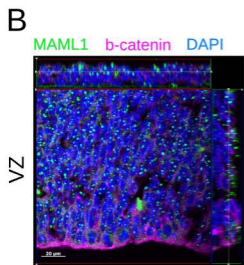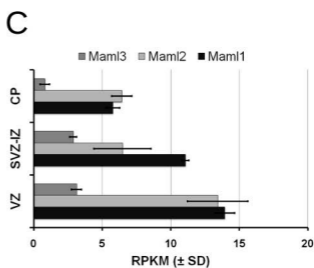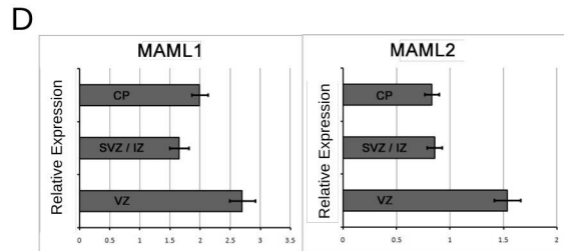

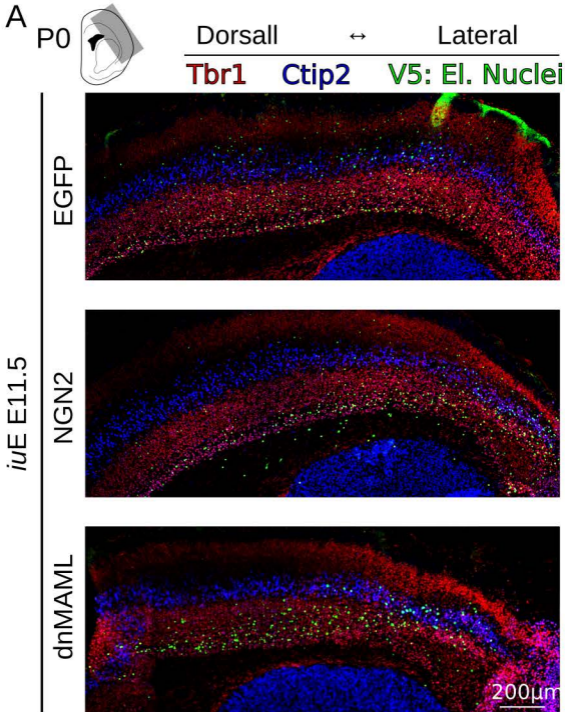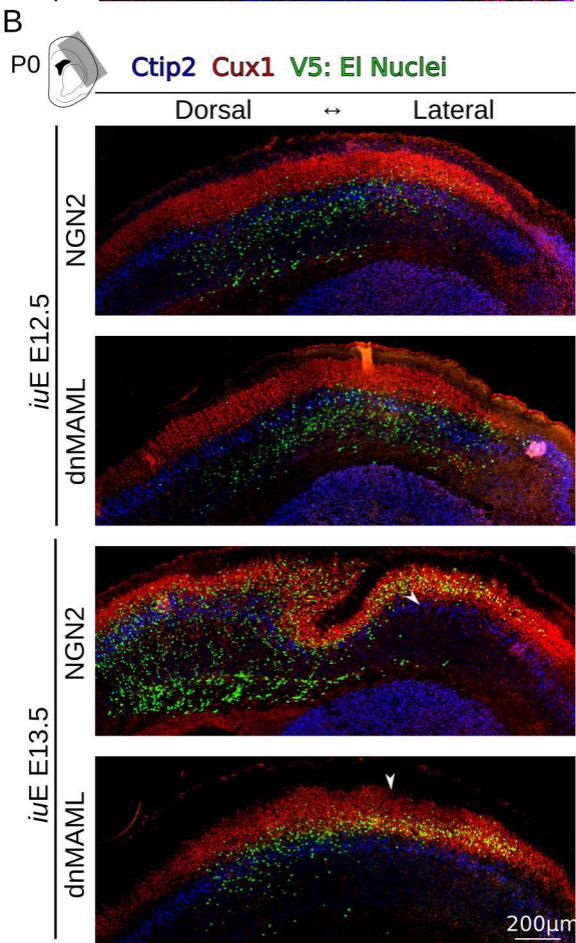

P21  
*iuE* E14.5

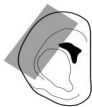

Lateral

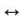

Dorsal

dnMAML

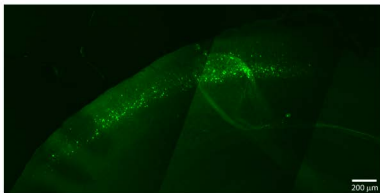

NGN2

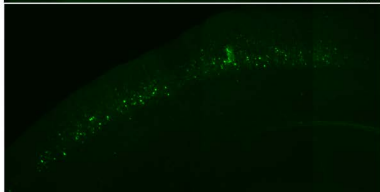

EGFP

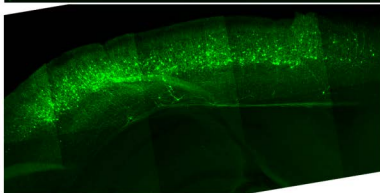

## Figure Legend Supplementary Figures

### Figure S1. MAML expression and Loss-of-function

**A.** Confocal z-stack showing immunohistochemistry for MAML1, b-catenin, and DAPI stained nuclei in E14.5 mouse ventricular zone (VZ). **B.** Graph shows mRNAseq expression of MAML1, 2, and 3 mRNAs in the mouse neocortex at E14.5. RPKM is reads per kilobase per million base pairs sequenced, +/- standard deviation. . Analysis of mRNAseq data shows that MAML1 and 2/3 mRNAs are expressed in the mouse neocortex from E11.5 to E17.5. **B,** Confocal images show immunostaining for MAML1 in the mouse neocortex at E14.5. **C,** Confocal images show immunostaining for MAML1 in the human dorsal cortex at E56. Cryosections were counterstained with Hoechst to highlight nuclei, Pax6 for progenitors, and Tbr2 for intermediate progenitors. Insets on the right show higher magnification views of the ventricular zone (VZ), subventricular zone (SVZ), and outer SVZ (oSVZ). Scale bar = 20um.

### Figure S2. Forced neurogenesis exposes regional gradient in intrinsic fate clock.

**A.** Comparing the long-term effects of dnMAML to NGN2 (Neurogenin2), and control EGFP on cortical development. Embryos were electroporated at E11.5 then sacrificed at P0. To ascertain co-localization of Tbr1 or Ctip2, we stained sections for the nuclear V5 (Green); Overexpression of either NGN2 or dnMAML drives neurogenesis and of differentiation of neurons. The overview panel exposes a regional gradient in the destination of neurons born on the same day. Most cells in the dorsal medial aspect of the cortex settle in the deep layers. On the lateral aspect of the cortex, cells electroporated at E11.5 reach layer IV. Scale bar 200  $\mu$ m.

**B.** *In utero* electroporations were carried out in E12.5 or E13.5 mouse embryo forebrain; embryos were harvested at P0. Electroporations at E12.5 of either dnMAML or NGN2 seen in coronal sections of dorsal cortex at P0 with nuclear V5 (Green) labeling; The overexpression of either NGN2 or dnMAML drives the radial migration of differentiating neurons, however, the final destination of neurons depends on the region of birth. Immunohistochemistry for the layer markers Ctip2 and Cux 1 demonstrates regional spread in the destination of neurons born at E12.5 and E13.5. Scale bar 200  $\mu$ m.

### Figure S3. Panoramic view exposes regional gradient in intrinsic fate.

Comparing the long-term effects of dnMAML to NGN2 (Neurogenin2), and control EGFP on cortical development. Embryos were electroporated at E14.5 then sacrificed at P21. Overexpression of either NGN2 or dnMAML drives neurogenesis and of differentiation of neurons. The overview panel exposes a regional gradient in the destination of neurons born on the same day. Cells born at E14.5 settle in layer IV on the dorsal medial aspect of the cortex and upper layers on the lateral aspect of the cortex. Scale bar 200  $\mu$ m.
